# Supplementary material
Source: MDPI journal article supplement (https://www.mdpi.com/2311-7524/9/5/598)
Supplement: s1 [file s1]

**Table S1. Statistical Analysis of all the analysed variables with their level of significance and their *p*-values**

### 1. One-Way ANOVA - Weight

Dependent variable: Weight

Factor: Sample name

No. of observations: 9

No. of levels: 3

| ANOVA Table for Weight at harvest by Sample name |                |    |             |         |         |
|--------------------------------------------------|----------------|----|-------------|---------|---------|
| Source                                           | Sum of Squares | Df | Mean Square | F-Ratio | P-Value |
| Between groups                                   | 1.99049        | 2  | 0.995244    | 29.19   | 0.0008  |
| Within groups                                    | 0.2046         | 6  | 0.0341      |         |         |
| Total (Corr.)                                    | 2.1909         | 8  |             |         |         |

| Multiple Range Tests for Weight by Sample name (Method: 95% Duncan) |       |         |                    |
|---------------------------------------------------------------------|-------|---------|--------------------|
| Sample name                                                         | Count | Mean    | Homogeneous Groups |
| Jute Protocol 1                                                     | 3     | 5.43333 | b                  |
| Jute Protocol 2                                                     | 3     | 6.22667 | a                  |
| Peat (CTRL)                                                         | 3     | 6.55333 | a                  |

| Contrast                          | Sig. |
|-----------------------------------|------|
| Jute Protocol 2 - Jute Protocol 1 | *    |
| Jute Protocol 2 - Peat (CTRL)     |      |
| Jute Protocol 1 - Peat (CTRL)     | *    |

\* Denotes a statistically significant difference.

### 2. One-Way ANOVA - Height

Dependent variable: Height

Factor: Sample name

Number of observations: 9

Number of levels: 3

| ANOVA Table for Height at harvest by Sample name |                |    |             |         |         |
|--------------------------------------------------|----------------|----|-------------|---------|---------|
| Source                                           | Sum of Squares | Df | Mean Square | F-Ratio | P-Value |
| Between groups                                   | 0.5096         | 2  | 0.2548      | 5.64    | 0.0419  |
| Within groups                                    | 0.2712         | 6  | 0.0452      |         |         |
| Total (Corr.)                                    | 0.7808         | 8  |             |         |         |

| Multiple Range Tests for Height harvesting by Sample name (Method: 95% Duncan) |       |         |                    |
|--------------------------------------------------------------------------------|-------|---------|--------------------|
| Sample name                                                                    | Count | Mean    | Homogeneous Groups |
| Jute Protocol 1                                                                | 3     | 3.13333 | b                  |
| Jute Protocol 2                                                                | 3     | 3.69333 | a                  |
| Peat (CTRL)                                                                    | 3     | 3.77333 | a                  |

| Contrast | Sig. |
|----------|------|
|----------|------|

|                                   |   |
|-----------------------------------|---|
| Jute Protocol 2 - Jute Protocol 1 | * |
| Jute Protocol 2 - Peat (CTRL)     |   |
| Jute Protocol 1 - Peat (CTRL)     | * |

\* Denotes a statistically significant difference.

### 3. Multiple Sample Comparison - Texture/toughness

Sample 1 : jute

Sample 2 : peat

Sample 1: 10 values ranging from 0.6 to 0.75.

Sample 2: 10 values ranging from 0.6 to 0.9.

**ANOVA table**

| Source         | Sum of Squares | Df | Mean Square | F-Ratio | P-Value |
|----------------|----------------|----|-------------|---------|---------|
| Between groups | 0.0780132      | 1  | 0.0780132   | 14.38   | 0.0015  |
| Within groups  | 0.09225        | 17 | 0.00542647  |         |         |
| Total (Corr.)  | 0.170263       | 18 |             |         |         |

**Multiple Range Tests (Method: 95% Duncan)**

|                 | Count | Mean     | Homogeneous Groups |
|-----------------|-------|----------|--------------------|
| Jute Protocol 2 | 10    | 0.655    | b                  |
| Peat (CTRL)     | 10    | 0.783333 | a                  |

| Contrast                     | Sig. |
|------------------------------|------|
| Jute Protocol 2- Peat (CTRL) | *    |

\* Denotes a statistically significant difference.

### 4. Multiple Sample Comparisons - Phenols FW

Sample 1: Phenols Jute FW

Sample 2: Phenols Peat FW

Sample 1: 6 values ranging from 0.83 to 1.87

Sample 2: 6 values ranging from 0.53 to 1.69

**ANOVA table**

| Source         | Sum of Squares | Df | Mean Square | F-Ratio | P-Value |
|----------------|----------------|----|-------------|---------|---------|
| Between groups | 0.229633       | 1  | 0.229633    | 01.43   | 0.2590  |
| Within groups  | 1.60307        | 10 | 0.160307    |         |         |
| Total (Corr.)  | 2327.33        | 11 |             |         |         |

**Multiple Range Tests (Method: 95% Duncan)**

|                 | Count | Mean    | Homogeneous Groups |
|-----------------|-------|---------|--------------------|
| Phenols peat FW | 6     | 1.26667 | a                  |
| Phenols jute FW | 6     | 1.5433  | a                  |

| Contrast                          | Sig. |
|-----------------------------------|------|
| Phenols peat FW – Phenols jute FW |      |

## 5. Multiple Sample Comparison - Phenols DW

Sample 1: Phenols Jute DW

Sample 2: Phenols Peat DW

Sample 1: 6 values ranging from 16.04 to 35.95

Sample 2: 6 values ranging from 10.11 to 32.57

ANOVA table

| Source         | Sum of Squares | Df | Mean Square | F-Ratio | P-Value |
|----------------|----------------|----|-------------|---------|---------|
| Between groups | 83.8994        | 1  | 83.8984     | 1.41    | 0.2626  |
| Within groups  | 595.235        | 10 | 59.5235     |         |         |
| Total (Corr.)  | 679.134        | 11 |             |         |         |

Multiple Range Tests (Method: 95% Duncan)

|                 | Count | Mean    | Homogeneous Groups |
|-----------------|-------|---------|--------------------|
| Phenols peat DW | 6     | 24.3867 | a                  |
| Phenols jute DW | 6     | 29.6750 | a                  |

| Contrast                          | Sig. |
|-----------------------------------|------|
| Phenols peat DW – Phenols jute DW |      |

## 6. Multiple Sample Comparison - Chl *a*

Sample 1: Chl *a* jute

Sample 2: Chl *a* peat

Sample 1: 3 values ranging from 337.0 to 383.0

Sample 2: 3 values ranging from 312.0 to 354.0

ANOVA table

| Source         | Sum of Squares | Df | Mean Square | F-Ratio | P-Value |
|----------------|----------------|----|-------------|---------|---------|
| Between groups | 1176.0         | 1  | 1176.0      | 2.42    | 0.1947  |
| Within groups  | 1943.33        | 4  | 485.833     |         |         |
| Total (Corr.)  | 3119.33        | 5  |             |         |         |

Multiple Range Tests (Method: 95% Duncan)

|                   | Count | Mean    | Homogeneous Groups |
|-------------------|-------|---------|--------------------|
| Chl <i>a</i> peat | 3     | 332.333 | a                  |
| Chl <i>a</i> jute | 3     | 360.333 | a                  |

| Contrast                              | Sig. |
|---------------------------------------|------|
| Chl <i>a</i> peat – Chl <i>a</i> jute |      |

## 7. Multiple Sample Comparison - Chl *b*

Sample 1: Chl *b* jute

Sample 2: Chl *b* peat

Sample 1: 3 values ranging from 150.0 to 200.0

Sample 2: 3 values ranging from 144.0 to 187.0

| ANOVA table    |                |    |             |         |         |
|----------------|----------------|----|-------------|---------|---------|
| Source         | Sum of Squares | Df | Mean Square | F-Ratio | P-Value |
| Between groups | 150            | 1  | 150         | 0.28    | 0.6274  |
| Within groups  | 2177.33        | 4  | 544.333     |         |         |
| Total (Corr.)  | 2327.33        | 5  |             |         |         |

| Multiple Range Tests (Method: 95% Duncan) |       |         |                    |
|-------------------------------------------|-------|---------|--------------------|
|                                           | Count | Mean    | Homogeneous Groups |
| Chl <i>b</i> peat                         | 3     | 165.667 | a                  |
| Chl <i>b</i> jute                         | 3     | 175.667 | a                  |

| Contrast                              | Sig. |
|---------------------------------------|------|
| Chl <i>b</i> peat – Chl <i>b</i> jute |      |

## 8. Multiple Sample Comparison - Carotenoid

Sample 1: Carotenoid jute Sample

Sample 2: Carotenoid peat

Sample 1: 3 values ranging from 67.0 to 77.0

Sample 2: 3 values ranging from 54.0 to 59.0

| ANOVA Table    |                |    |             |         |         |
|----------------|----------------|----|-------------|---------|---------|
| Source         | Sum of Squares | Df | Mean Square | F-Ratio | P-Value |
| Between groups | 337.5          | 1  | 337.5       | 20.66   | 0.0105  |
| Within groups  | 65.3333        | 4  | 16.3333     |         |         |
| Total (Corr.)  | 402.833        | 5  |             |         |         |

| Multiple Range Tests (Method: 95% Duncan) |       |         |                    |
|-------------------------------------------|-------|---------|--------------------|
|                                           | Count | Mean    | Homogeneous Groups |
| Carotenoid peat                           | 3     | 56.3333 | b                  |
| Carotenoid jute                           | 3     | 71.3333 | a                  |

| Contrast                          | Sig. | Difference |
|-----------------------------------|------|------------|
| Carotenoid peat - Carotenoid jute | *    | 15         |

\* Denotes a statistically significant difference
